# Supplementary material
Source: PubMed Central journal article supplement (PMC4409768)
Supplement: NIHMS661639-supplement-supplement_1.pdf [file NIHMS661639-supplement-supplement_1.pdf]

## EXTENDED EXPERIMENTAL PROCEDURES

**DNA sequences:** Oligonucleotides (synthesized by IDT) for PCR amplification of templates. The name of the oligonucleotide corresponds to the labeling strand and position. Biosg and ibio refer to biotin, idSp refers to abasic site, iAmMC6T refers to amino-modified C6 dT linker for labeling with Cy3 or Cy5, 5Cy5 and 5Cy3 refer to end-labeled positions generated through phosphoramidite chemistry. Other abbreviations include: LH (left half), RH (right half), MF (middle fragment) RRH (right right handle), LL(left left), RTA (right TA (dinucleotide), A (for immobilization scheme A), B (for immobilization scheme B). The primer sequences are color-coded according to the sections of the 601 template (see below): extra-chromosomal handles (black); left outer quarter (magenta); left inner quarter (orange); right inner quarter (green); right outer quarter (blue).

- (1) I77 5'- /5Biosg/TATA CGCGG CCGCC CTGGAGAATC CCGGTGCCGA  
GGCCGCTCAA TTGGTCGTAG ACAGCTCTAG CACCGCTTAA  
ACGCACGTAC GCGCTG/iAmMC6T/CCC
- (2) J-12 5'- GG GCGGCGACCT /idSp/GGTCGCTG/iAmMC6T/T CAATACATGC  
ACAGGAT GTATATATC
- (3) I68 5'-/5Biosg/TATA CGCGG CCGCC CTGGAGAATC CCGGTGCCGA  
GGCCGCTCAA TTGGTCGTAG ACAGCTCTAG CACCGCTTAA  
ACGCACG/iAmMC6T/AC G
- (4) J-1 5'- GG GCGGCGACCT /idSp/GGTCGCTGTT CAATACATG/iAmMC6T/  
ACAGGAT GTATATA
- (5) J7 5'- GG GCGGCGACCT /idSp/GGTCGCTGTT CAATACATGC  
ACAGGA/iAmMC6T/ GTATATA
- (6) I57 5'-/5Biosg/TATA CGCGG CCGCC CTGGAGAATC CCGGTGCCGA  
GGCCGCTCAA TTGGTCGTAG ACAGCTCTAG  
CACCGC/iAmMC6T/TAA
- (7) J15 5'- GG GCGGCGACCT /idSp/GGTCGCTGTT CAATACATGC ACAGGAT  
GTATATA/iAmMC6T/CT G
- (8) I46 5'-/5Biosg/TATA CGCGGCCGCC CTGGAGAATC CCGGTGCCGA  
GGCCGCTCAA TTGGTCGTAG ACAGC/iAmMC6T/CTA
- (9) J24 5'- GG GCGGCGACCT /idSp/GGTCGCTGTT CAATACATGC ACAGGAT  
GTATATATCT GACACG/iAmMC6T/GCC TGGA
- (10) I38 5'-/5Biosg/TATA CGCGGCCGCC CTGGAGAATC CCGGTGCCGA  
GGCCGCTCAA TTGGTCG/iAmMC6T/AG A
- (11) J28 5'-GG GCGGCGACCT /idSp/GGTCGCTGTT CAATACATGC ACAGGAT  
GTATATATCT GACACGTGCC /iAmMC6T/GGA
- (12) I27 5' GG GCGGCGACCT /idSp/GGA CCCTATA CGCGG CCGCC  
CTGGAGAATC CCGGTGCCGA GGCCGCTCAA  
TTGGTCG/iAmMC6T/AG A
- (13) J45 5'- /5Biosg/TGTT CAATACATGC ACAGGAT GTATATATCT  
GACACGTGCC TGGAGACTAG GGAGTAA/iAmMC6T/CC C
- (14) I15 5'- GG GCGGCGACCT /idSp/ GGA CCC TATA CGCGG CCGCC  
CTGGAGAATC CCGG/iAmMC6T/GCC
- (15) J57 5'- /5Biosg/TGTT CAATACATGC ACAGGAT GTATATATCT  
GACACGTGCC TGGAGACTAG GGAGTAATCC  
CCTTGCGGG/iAmMC6T/ TAA
- (16) I9-A 5'-/5Biosg/TATA CGCGG CCGCC CTGGAGAA/iAmMC6T/C CC
- (17) J58-A 5'- GG GCGGCGACCT /idSp/TGTT CAATACATGC ACAGGAT  
GTATATATCT GACACGTGCC TGGAGACTAG GGAGTAATCC  
CCTTGCGGGT /iAmMC6T/AAA

- (18) I9 5'- GG GCGGCGACCT /idSp/ TATA CGCGGCCGCC  
CTGGAGAA/iAmMC6T/C CC
- (19) J58 5'- /5Biosg/TGTT CAATACATGC ACAGGAT GTATATATCT  
GACACGTGCC TGGAGACTAG GGAGTAATCC CCTTGGCGGT  
/iAmMC6T/AAA
- (20) I-1 5'-/5Biosg/TATA CGCGG CCGC/iAmMC6T/ CTGGAGAA/iAmMC6T/C  
CCGGT
- (21) J79 5'- GG GCGGCGACCT /idSp/GGTCGCTGTT CAATACATGC ACAGGAT  
GTATATATCT GACACGTGCC TGGAGACTAG GGAGTAATCC  
CCTTGGCGGT TAAAACGCGG GGGACAGCGC G/iAmMC6T/AC G
- (22) I-12 5'-/5Biosg/ GGACCCTA/iAmMC6T/A CGCGGCCGCC  
CTGGAGAA/iAmMC6T/C CCGGT
- (23) I58-MF 5'- /5Biosg/TATA CGCGGCCGCC CTGGAGAATC CCGGTGCCGA  
GGCCGCTCAA TTGGTCGGGA GTAATCCCCT  
TGGCGGT/iAmMC6T/AA A
- (24) J58-MF 5'- /5Biosg/TGTT CAATACATGC ACAGGAT GTATATATCT  
GACACGTGCC TGGAGACTAG TAGACAGCTC TAGCACCGCT  
/iAmMC6T/AAA
- (25) J58-RTA 5'- /5Biosg/TGTT CAATACATGC ACAGGAT GTATATATCT  
GACACGTGCC TGGAGACTAG TAAGTAATCC TATTGGCGGT  
/iAmMC6T/AAA
- (26) I9-RRH-1-10 5'- GG GCGGCGACCT /idSp/ TATA CAATACATGC  
CTGGAGAA/iAmMC6T/C CC
- (27) J58-LL8-24 5'- /5Biosg/TGTT CAATACATGC ACAGGAT ATCCCGGTGC  
CGAGGCCGCC TGGAGACTAG GGAGTAATCC CCTTGGCGGT  
/iAmMC6T/AAA
- (28) J7-LL8-24 5'- GG GCGGCGACCT /idSp/GGTCGCTGTT CAATACATGC  
ACAGGA/iAmMC6T/ ATCCCG
- (29) DIG oligo 5'-AGGTCGCCGCCCT TT/digoxigenin/
- (30) 601-LH top /5Cy3/CAGAATCCGT CTGGAGAATC CCGGTGCCGA GGCCGCTCAA  
TTGGTCGTAG ACAGCTCTAG CACCGCTTAA ACGCACGTAC GCG
- (31) 601-LH bottom /5Cy5/ACGGATTCTG CGC GTACGTGCGT /iBiodT/TAAGCGGTG  
CTAGAGCTGT CTACGACCAA TTGAGCGGCC TCGGCACCGG  
GATTCTCCAG
- (32) 601-RH top /5Cy5/ACGGATTCTG TGTCCC CCGCGTT/iBiodT/TA ACCGCCAAGG  
GGATTACTCC CTAGTCTCCA GGCACGTGTC AGATATATAC  
ATCCTGT
- (33) 601-RH bottom /5Cy3/CAGAATCCGT ACAGGAT GTATATATCT GACACGTGCC  
TGGAGACTAG GGAGTAATCC CCTTGGCGGT TAAAACGCGG  
GGGACA
- (34) 601MF-LH top /5Cy3/CAGAATCCGT CTGGAGAATC CCGGTGCCGA GGCCGCTCAA  
TTGGTCGGGA GTAATCCCCT TGGCGGTTAA AACGCGGGGG ACA
- (35) 601MF-LH bottom /5Cy5/ACGGATTCTG TGT CCCC CGCGTT /iBiodT/TAACCGCCA  
AGGGGATTAC TCCGACCAA TTGAGCGGCC TCGGCACCGG  
GATTCTCCAG
- (36) 601MF-RH top /5Cy5/ACGGATTCTG CGCGTA CGTGCGT/iBiodT/TA AGCGGTGCTA  
GAGCTGTCTA CTAGTCTCCA GGCACGTGTC AGATATATAC  
ATCCTGT
- (37) 601MF-RH bottom /5Cy3/CAGAATCCGT ACAGGAT GTATATATCT GACACGTGCC  
TGGAGACTAG TAGACAGCTC TAGCACCGCT TAAACGCACG  
TACCGC

- (38) 601RTA-RH top /5Cy5/ACGGATTCTG TGTCTA CCGCGTT/iBiodT/TA ACCGCCATA  
GGATTACTTA CTAGTCTCCA GGCACGTGTC AGATATATAC  
ATCCTGT
- (39) 601RTA-RH bottom /5Cy3/CAGAATCCGT ACAGGAT GTATATATCT GACACGTGCC  
TGGAGACTAG TAAGTAATCC TATTGGCGGT TAAAACGCGG  
TAGACA
- (40) LL8-24-RH top /5Cy5/ACGGATTCTG TGTCCC CCGCGTT/iBiodT/TA ACCGCCAAGG  
GGATTACTCC CTAGTCTCCA GGCGGCCTCG GCACCGGGAT  
ATCCTGT
- (41) LL8-24-RH bottom /5Cy3/CAGAATCCGT ACAGGAT ATCCCGGTGC CGAGGCCGCC  
TGGAGACTAG GGAGTAATCC CCTTGGCGGT TAAAACGCGG  
GGGACA

### DNA templates and labeling schemes:

**A:** The templates of the 601 sequence and derivatives used in this investigation. The 601 template is Addgene Plasmid 26656: pGEM-3z/601 plasmid. The top and bottom strands of the 601 sequence are denoted by I and J strand, respectively (pdb file: 3MVD). The ‘left’ and ‘right’ sides in our templates correspond to the 5’ and 3’ ends of the I strand shown in the table. The templates 601 RRH1-10 and 601 LL8-24 were synthesized by PCR, while 601MF and 601RTA were synthesized by IDT. The 601 sequence is color coded: extra-chromosomal handles (black); left outer quarter (magenta); left inner quarter (orange); right inner quarter (green); right outer quarter (blue). The parts of the derivative sequences which are varied in comparison to the original 601 sequence are underlined and changed to the corresponding color portion of the 601 sequence.

**B:** Labeling schemes and names for all reconstituted nucleosomes using the original 601 sequence. The top and bottom strands of the 601 sequence are denoted by I and J strand, respectively. The I strand is shown in the table. The 601 sequence is color coded as described in panel A. Labeled positions are highlighted in red, and underlined. The sequence index starts from the 5’ end of the 601 on each strand. The specific primers (listed above) used to generate each template are listed next to the template name.

### A

**601** GGACCCTATA CGCGGCCGCC CTGGAGAATC CCGGTGCCGA GGCCGCTCAA  
TTGGTCGTAG ACAGCTCTAG CACCGCTTAA ACGCACGTAC GCGCTGTCCC  
CCGCGTTTTA ACGCCAAGG GGATTACTCC CTAGTCTCCA GGCACGTGTC  
AGATATATAC ATCCTGT GCATGTATTG AACAGCGACC

**RRH1-10** GGACCCTATA CAATACATGC CTGGAGAATC CCGGTGCCGA GGCCGCTCAA  
TTGGTCGTAG ACAGCTCTAG CACCGCTTAA ACGCACGTAC GCGCTGTCCC  
CCGCGTTTTA ACGCCAAGG GGATTACTCC CTAGTCTCCA GGCACGTGTC  
AGATATATAC ATCCTGT GCATGTATTG AACAGCGACC

**LL8-24** GGACCCTATA CGCGGCCGCC CTGGAGAATC CCGGTGCCGA GGCCGCTCAA  
TTGGTCGTAG ACAGCTCTAG CACCGCTTAA ACGCACGTAC GCGCTGTCCC  
CCGCGTTTTA ACGCCAAGG GGATTACTCC CTAGTCTCCA GGCGGCCTCG  
GCACCGGGAT ATCCTGT GCATGTATTG AACAGCGACC

**601MF** GGACCCTATA CGCGGCCGCC CTGGAGAATC CCGGTGCCGA GGCCGCTCAA  
TTGGTCGGGA GTAATCCCT TGGCGGTAA AACGCGGGG ACACCGCGTA  
CGTGCGTTTA AGCGGTGCTA GAGCTGTCTA CTAGTCTCCA GGCACGTGTC  
AGATATATAC ATCCTGT GCATGTATTG AACAGCGACC

**601RTA** GGACCCTATA CGCGGCCGCC CTGGAGAATC CCGGTGCCGA GGCCGCTCAA  
TTGGTCGTAG ACAGCTCTAG CACCGCTTAA ACGCACGTAC GCGCTGTCTA

CCGCGTTTTA ACCGCCAATA GGATTACTTA CTAGTCTCCA GGCACGTGTC  
AGATATATAC ATCCTGT GCATGTATTG AACAGCGACC

B

**ED1-12 (I77,J-12)** TATA CGCGGCCGCC CTGGAGAATC CCGGTGCCGA GGCCGCTCAA  
TTGGTCGTAG ACAGCTCTAG CACCGCTTAA ACGCACGTAC GCGCTGTCCC  
CCGCGTTTTA ACCGCCAAGG GGATTACTCC CTAGTCTCCA GGCACGTGTC  
AGATATATAC ATCCTGT GCATGTATTG AACAGCGACC

**ED1-1 (I68,J-1)** TATA CGCGGCCGCC CTGGAGAATC CCGGTGCCGA GGCCGCTCAA  
TTGGTCGTAG ACAGCTCTAG CACCGCTTAA ACGCACGTAC GCGCTGTCCC  
CCGCGTTTTA ACCGCCAAGG GGATTACTCC CTAGTCTCCA GGCACGTGTC  
AGATATATAC ATCCTGT CATGTATTG AACAGCGACC

**ED1 (I68,J7)** TATA CGCGGCCGCC CTGGAGAATC CCGGTGCCGA GGCCGCTCAA  
TTGGTCGTAG ACAGCTCTAG CACCGCTTAA ACGCACGTAC GCGCTGTCCC  
CCGCGTTTTA ACCGCCAAGG GGATTACTCC CTAGTCTCCA GGCACGTGTC  
AGATATATAC ATCCTGT GCATGTATTG AACAGCGACC

**ED1.5 (I57,J15)** TATA CGCGGCCGCC CTGGAGAATC CCGGTGCCGA GGCCGCTCAA  
TTGGTCGTAG ACAGCTCTAG CACCGCTTAA ACGCACGTAC GCGCTGTCCC  
CCGCGTTTTA ACCGCCAAGG GGATTACTCC CTAGTCTCCA GGCACGTGTC  
AGATATATAC ATCCTGT GCATGTATTG AACAGCGACC

**ED1.7 (I46,J24)** TATA CGCGGCCGCC CTGGAGAATC CCGGTGCCGA GGCCGCTCAA  
TTGGTCGTAG ACAGCTCTAG CACCGCTTAA ACGCACGTAC GCGCTGTCCC  
CCGCGTTTTA ACCGCCAAGG GGATTACTCC CTAGTCTCCA GGCACGTGTC  
AGATATATAC ATCCTGT GCATGTATTG AACAGCGACC

**INT (I38,J28)** TATA CGCGGCCGCC CTGGAGAATC CCGGTGCCGA GGCCGCTCAA  
TTGGTCGTAG ACAGCTCTAG CACCGCTTAA ACGCACGTAC GCGCTGTCCC  
CCGCGTTTTA ACCGCCAAGG GGATTACTCC CTAGTCTCCA GGCACGTGTC  
AGATATATAC ATCCTGT GCATGTATTG AACAGCGACC

**ED2.8 (I27,J45)** GGACCCTATA CGCGGCCGCC CTGGAGAATC CCGGTGCCGA GGCCGCTCAA  
TTGGTCGTAG ACAGCTCTAG CACCGCTTAA ACGCACGTAC GCGCTGTCCC  
CCGCGTTTTA ACCGCCAAGG GGATTACTCC CTAGTCTCCA GGCACGTGTC  
AGATATATAC ATCCTGT GCATGTATTG AACA

**ED2.5 (I15,J57)** GGACCCTATA CGCGGCCGCC CTGGAGAATC CCGGTGCCGA GGCCGCTCAA  
TTGGTCGTAG ACAGCTCTAG CACCGCTTAA ACGCACGTAC GCGCTGTCCC  
CCGCGTTTTA ACCGCCAAGG GGATTACTCC CTAGTCTCCA GGCACGTGTC  
AGATATATAC ATCCTGT GCATGTATTG AACA

**ED2 (I9,J58)** GGACCCTATA CGCGGCCGCC CTGGAGAATC CCGGTGCCGA GGCCGCTCAA  
TTGGTCGTAG ACAGCTCTAG CACCGCTTAA ACGCACGTAC GCGCTGTCCC  
CCGCGTTTTA ACCGCCAAGG GGATTACTCC CTAGTCTCCA GGCACGTGTC  
AGATATATAC ATCCTGT GCATGTATTG AACA

**ED2-1 (I-1,J79)** GGACCCTATA CGCGGCCGCC CTGGAGAATC CCGGTGCCGA GGCCGCTCAA  
TTGGTCGTAG ACAGCTCTAG CACCGCTTAA ACGCACGTAC GCGCTGTCCC  
CCGCGTTTTA ACCGCCAAGG GGATTACTCC CTAGTCTCCA GGCACGTGTC  
AGATATATAC ATCCTGT GCATGTATTG AACA

**ED2-12 (I-12,J79)** GGACCCTATA CGCGGCCGCC CTGGAGAATC CCGGTGCCGA GGCCGCTCAA  
TTGGTCGTAG ACAGCTCTAG CACCGCTTAA ACGCACGTAC GCGCTGTCCC  
CCGCGTTTTA ACCGCCAAGG GGATTACTCC CTAGTCTCCA GGCACGTGTC  
AGATATATAC ATCCTGT GCATGTATTG AACA

**IJ-12 (I-12,J-12)** GGACCCTATA CGCGGCCGCC CTGGAGAATC CCGGTGCCGA GGCCGCTCAA  
TTGGTCGTAG ACAGCTCTAG CACCGCTTAA ACGCACGTAC GCGCTGTCCC  
CCGCGTTTTA ACCGCCAAGG GGATTACTCC CTAGTCTCCA GGCACGTGTC  
AGATATATAC ATCCTGT GCATGTATTG AACAGCGACC

## Monte Carlo Simulation Procedures

We adopted a continuum model of symmetric nucleosomal DNA unwrapping developed by Sudhanshu *et al.* (Sudhanshu et al., 2011) and extended it to a more general, asymmetric case. In this model, the nucleosomal DNA is modeled as a left handed helix with a radius of 4.18 nm and height per turn of 2.39 nm. The total free energy change  $\Delta F$  upon binding of DNA to the nucleosome spool (the histone core) relative to the unbound state is calculated at forces ranging from 0 pN to 12 pN as was done in Figure 3 of Sudhanshu *et al.* (Sudhanshu et al., 2011). In a more general case of asymmetric unwrapping,  $m$  and  $n$  base pairs can be unwrapped from the weak and strong side, respectively, where  $m$  can be different from  $n$ . In the model of Sudhanshu et al,  $m=n$ . In our two-dimensional model, in order to calculate the free energy change  $\Delta F$  for  $(m, n)$  values, we assumed that the free energy change  $\Delta F$  for  $(m, n)$  is equal to the  $(m + n)$  base pairs unwrapped case in the symmetric model. In addition, we reduced the binding energy of the inner quarter of the weak side to 1.5 pN nm / bp while all other quarters (two outer quarters and the inner quarter of the strong side) are assumed to have the binding energy of 3.5 pN nm / bp so that the average binding energy is 3 pN nm / bp as was used by Sudhanshu et al. With this energy function, we performed Monte Carlo simulations starting from 0.1 pN and increasing the force in 0.1 pN increments every 2000 time steps until 10 pN of force was reached. The initial position was  $m=1$  and  $n=1$ .

## Supplemental References

Sudhanshu, B., Mihardja, S., Koslover, E.F., Mehraeen, S., Bustamante, C., and Spakowitz, A.J. (2011). Tension-dependent structural deformation alters single-molecule transition kinetics. *Proceedings of the National Academy of Sciences of the United States of America* 108, 1885-1890.
