# Supplementary material
Source: PubMed Central journal article supplement (PMC4409768)

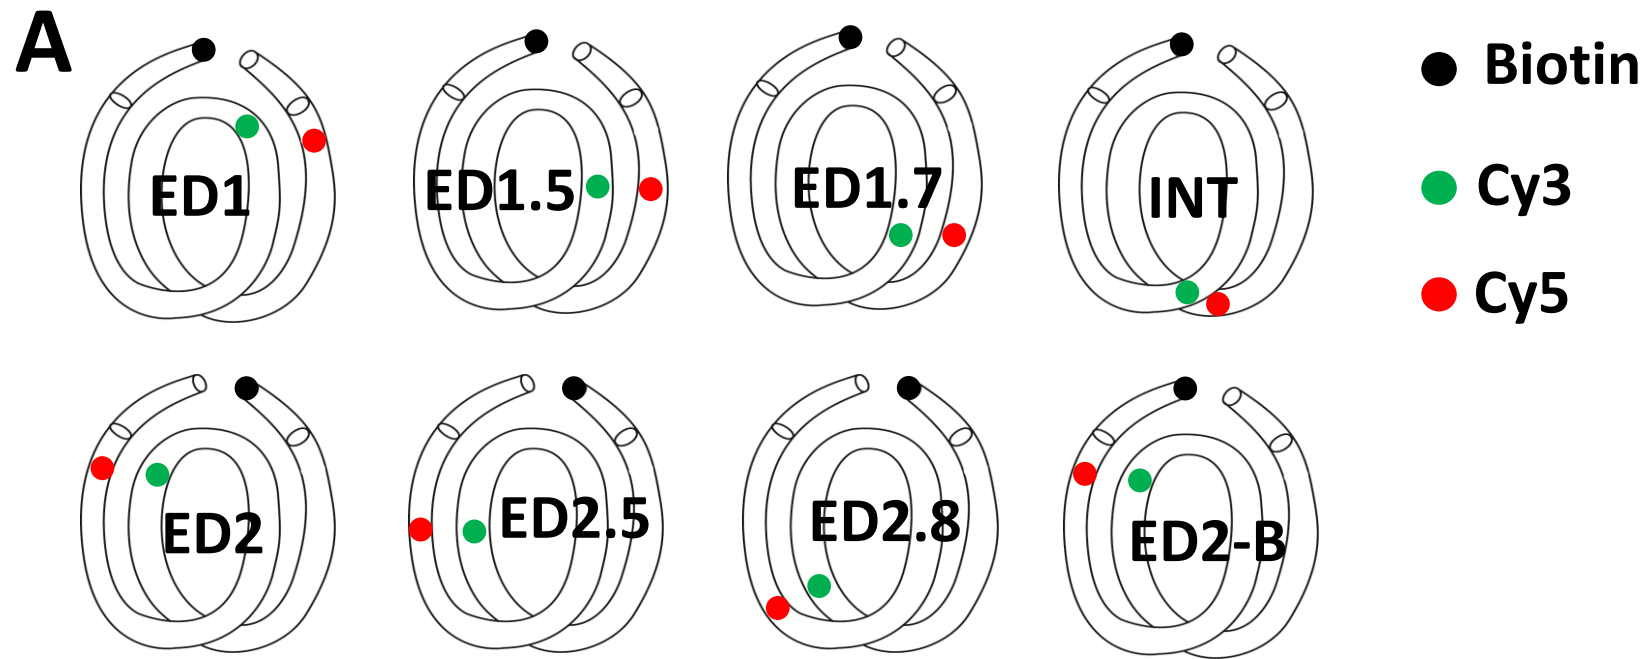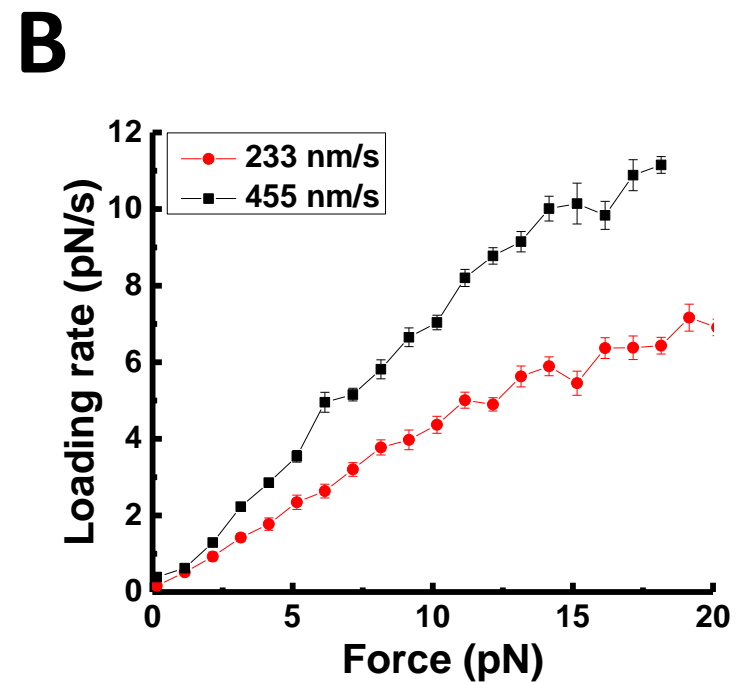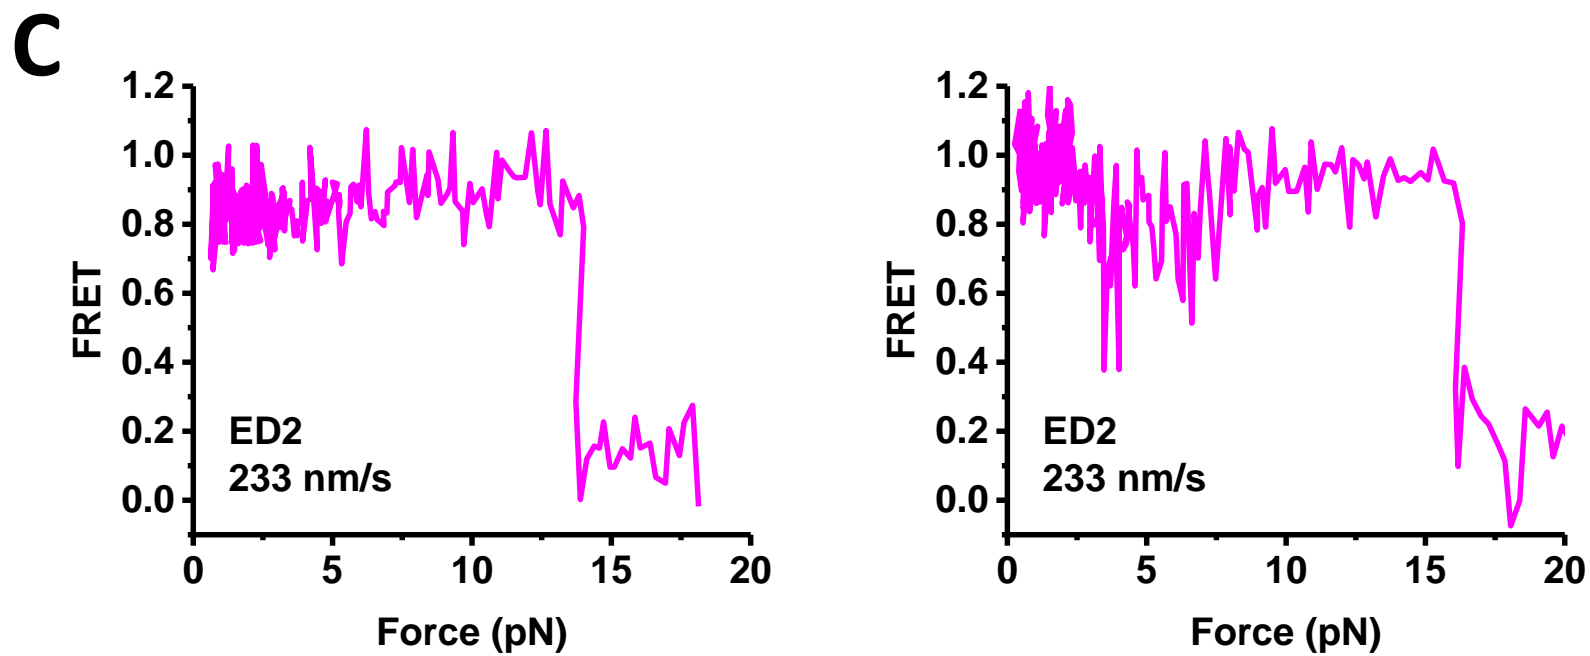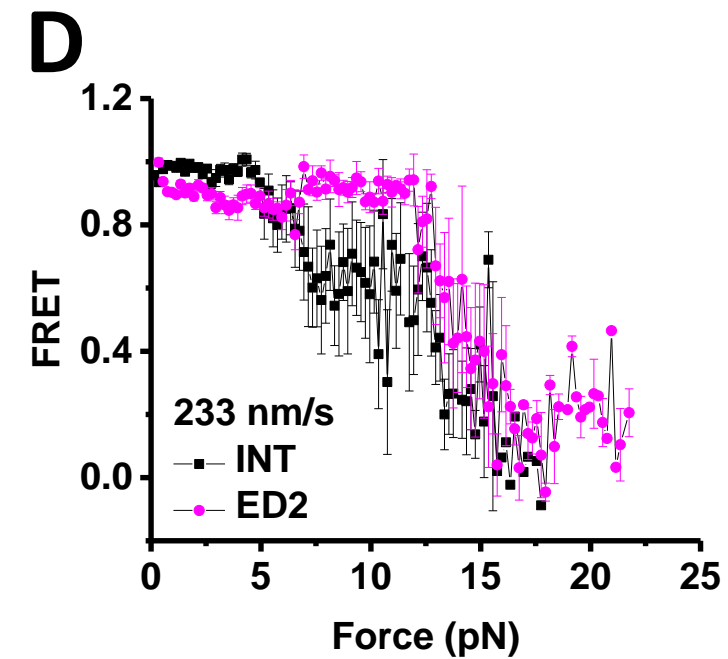

Supplement: NIHMS661639-supplement-2.pdf [file NIHMS661639-supplement-2.pdf]

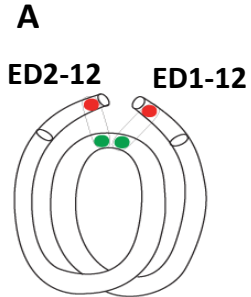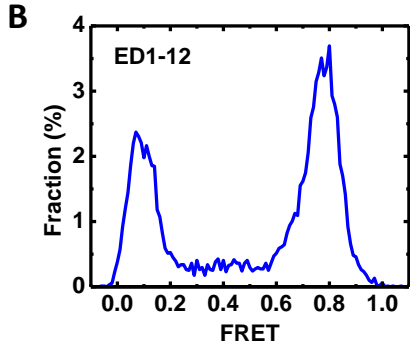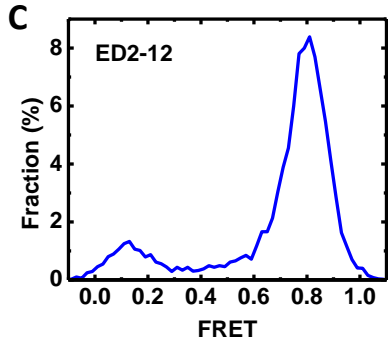

Supplement: NIHMS661639-supplement-3.pdf [file NIHMS661639-supplement-3.pdf]

**A**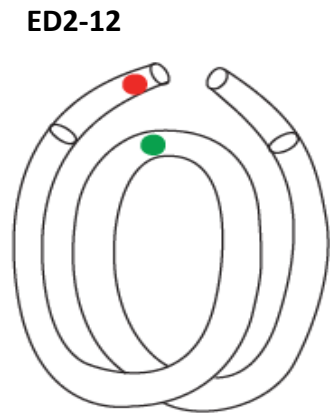**B**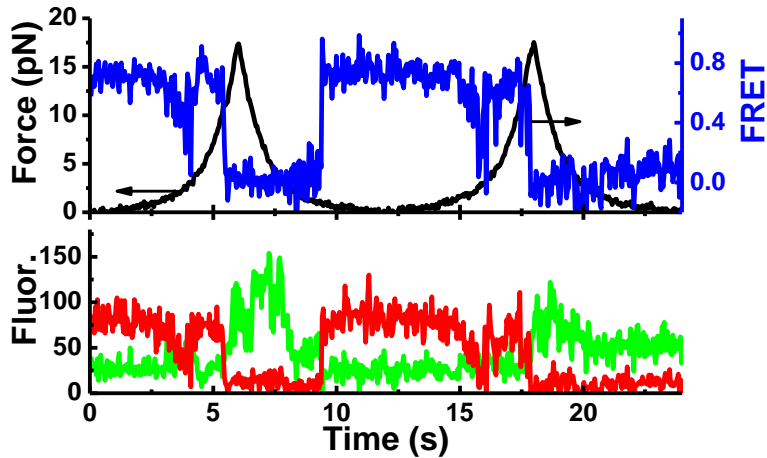**C**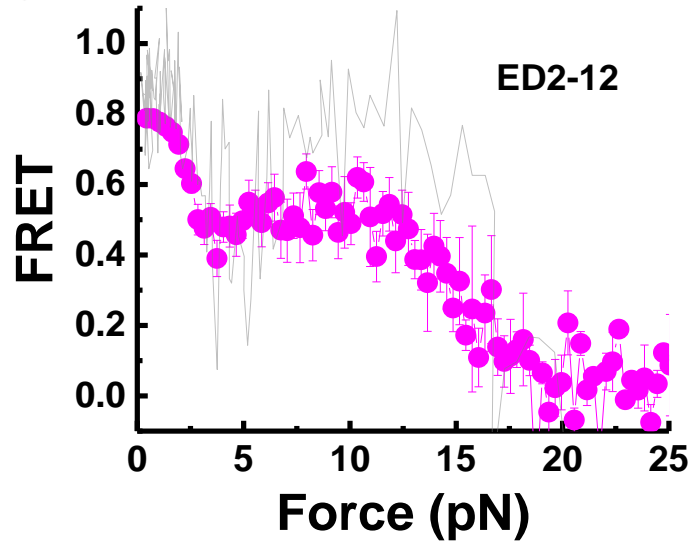

Supplement: NIHMS661639-supplement-4.pdf [file NIHMS661639-supplement-4.pdf]

**A**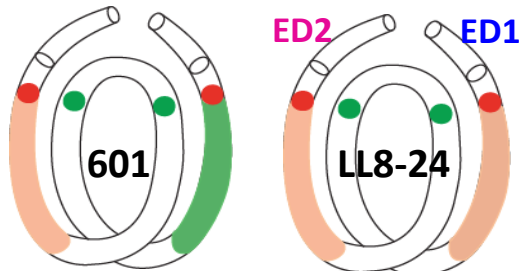**B**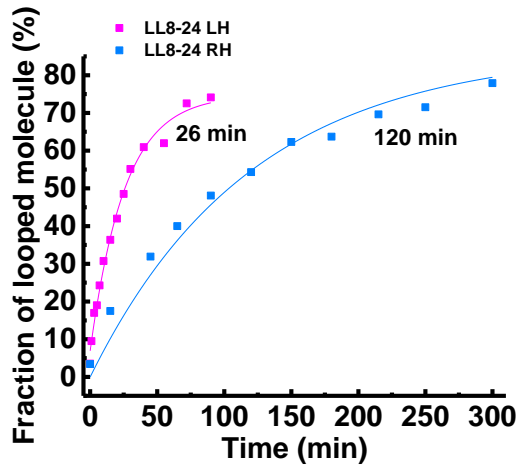**C**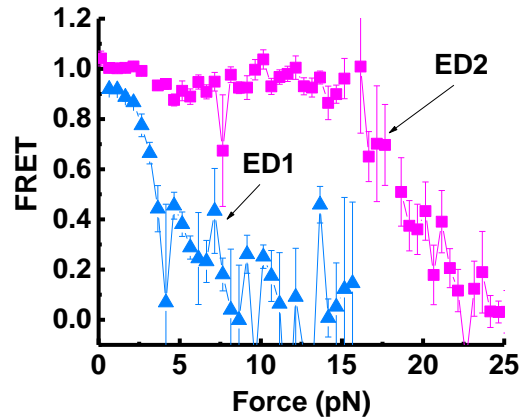

Supplement: NIHMS661639-supplement-5.pdf [file NIHMS661639-supplement-5.pdf]
